# Supplementary material for: The Influence of Event Valence and Emotional States on the Metaphorical Comprehension of Time
Source: Front Psychol. 2019 Mar 5;10:410. doi: 10.3389/fpsyg.2019.00410 (PMC6411794; doi:10.3389/fpsyg.2019.00410)
Supplement: Supplementary file 1 [file Table_1.XLSX]

## Sheet: Study 1
Happy Group								Angry Group								Anxious Group
Subject	Question 1	Question 2	Happy rating	Angry rating	Anxious rating	Consistency		Subject	Question 1	Question 2	Happy rating	Angry rating	Anxious rating	Consistency		Subject	Question 1	Question 2	Happy rating	Angry rating	Anxious rating	Consistency
1	2	1	5	0	1	1		1	2	2	1	6	4			1	1	1	1	0	3
2	1	1	8	0	3			2	1	2	4	5	3	1		2	2	2	2	2	5
3	2	2	7	0	4			3	2	1	0	6	2	1		3	2	1	0	0	2	1
4	2	2	5	0	0			4	2	1	0	8	2	1		4	2	1	2	3	7	1
5	2	1	8	0	0	1		5	2	1	0	6	3	1		5	1	1	0	0	6
6	1	2	7	0	2	1		6	2	1	4	5	4	1		6	1	1	0	2	5
7	1	1	8	0	0			7	1	1	0	5	3			7	1	2	0	0	8	1
8	1	2	6	1	2	1		8	1	1	0	6	0			8	1	2	0	6	7	1
9	1	1	7	0	4			9	2	2	1	6	1			9	1	1	2	2	5
10	2	1	8	0	4	1		10	2	2	5	6	3			10	2	1	2	4	5	1
11	1	1	7	0	1			11	2	1	1	6	5	1		11	1	1	3	0	5
12	2	2	5	0	2			12	2	1	1	5	2	1		12	2	1	1	2	4	1
13	2	2	6	1	1			13	2	2	0	4	0			13	2	1	0	0	2	1
14	2	1	8	0	0	1		14	1	2	0	8	5	1		14	2	1	1	3	6	1
15	2	2	5	1	1			15	2	2	0	8	0			15	1	1	2	0	6
16	2	1	8	0	0	1		16	2	1	0	6	4	1		16	2	1	0	0	8	1
17	2	1	8	0	0	1		17	1	2	0	6	5	1		17	2	1	0	0	5	1
18	2	1	6	1	3	1		18	2	2	0	5	4			18	2	1	2	4	6	1
19	2	1	8	0	2	1		19	1	1	0	6	2			19	2	1	1	2	5	1
20	2	1	8	0	2	1		20	2	2	4	8	5			20	2	2	0	0	5
21	2	1	7	0	4	1		21	1	2	1	6	4	1		21	2	2	0	5	8
22	2	2	8	0	4			22	2	1	0	6	4	1		22	2	1	0	0	3	1
23	2	2	6	1	1			23	2	1	1	3	1	1		24	2	1	0	1	2	1
24	2	1	6	1	0	1		24	2	1	0	8	6	1		25	1	1	0	0	5
25	2	1	5	0	0	1		54	1	1	1	4	0			26	2	2	3	2	4
26	2	1	7	1	3	1		55	2	2	5	7	5			27	2	2	0	4	6
27	2	2	8	0	4			60	2	2	0	4	0			28	1	2	0	3	6	1
28	2	1	6	0	1	1		61	2	1	0	7	0	1		29	2	2	0	1	6
29	1	1	7	0	2			62	2	2	4	5	3			30	1	1	2	5	6
30	2	1	5	1	1	1		63	2	1	0	5	1	1		31	1	1	1	1	3
31	2	1	8	0	1	1		64	2	1	0	1	0	1		32	1	1	0	0	2
32	1	1	8	0	0			66	1	1	1	6	3			33	1	2	0	4	7	1
33	2	1	6	0	2	1		67	1	2	0	6	4	1		34	2	2	0	0	6
34	2	1	8	2	1	1		69	1	2	0	8	4	1		35	2	2	0	0	4
35	2	1	8	0	0	1		72	2	1	0	2	0	1		36	2	2	0	2	5
36	2	1	8	0	2	1		73	2	1	0	8	7	1		37	2	1	3	3	6	1
37	2	1	5	2	3	1		74	1	1	2	6	1			39	1	1	2	4	4
38	2	1	6	1	1	1		76	2	2	0	6	3			43	1	2	6	1	7	1
39	2	1	7	0	0	1		79	2	1	1	6	4	1		49	1	2	0	3	6	1
40	2	2	8	0	0			82	2	2	0	6	5			50	1	2	1	2	5	1
41	2	1	7	0	0	1		85	2	2	0	4	0			51	2	2	0	0	8
44	2	2	7	1	5			86	1	2	0	5	4	1		52	1	1	0	1	3
46	2	1	6	2	5	1		87	2	1	4	5	3	1		53	2	2	1	2	6
48	1	1	8	1	6			89	2	2	0	5	0			54	1	1	2	4	6
50	2	1	5	2	4	1		90	2	1	2	6	5	1		55	2	1	0	1	6	1
51	1	1	6	0	0			91	1	2	4	5	2	1		56	2	1	0	0	5	1
52	2	1	5	0	4	1		92	1	1	0	1	0			59	2	2	0	4	8
53	2	1	6	0	1	1		94	2	2	2	6	5			62	2	1	0	0	6	1
54	1	1	8	0	1			96	1	1	0	6	1			63	2	1	0	2	6	1
56	2	1	8	0	0	1		99	2	1	0	6	3	1		64	2	1	5	2	6	1
57	2	1	6	0	0	1		100	1	1	0	3	0			66	2	2	0	2	6
58	2	1	8	0	3	1		ego-moving	34/51=66.7%	28/51=54.9%				27		68	2	2	3	1	6
60	2	1	7	0	3	1								27/51=53%		69	2	1	1	3	6	1
61	2	1	8	0	1	1		valid subjects: 51								70	2	1	0	0	5	1
62	2	2	7	2	5			ratio: 51/100=51%								72	2	1	2	2	6	1
63	2	1	7	0	2	1										74	2	1	3	5	5	1
64	2	2	6	1	1											75	2	2	0	0	3
65	2	1	6	0	3	1										77	2	2	1	4	7
66	1	1	8	0	3											78	2	2	0	3	6
67	2	1	8	0	1	1										79	2	1	1	1	6	1
68	1	1	8	0	1											80	2	2	1	0	7
70	2	1	5	4	2	1										82	2	2	0	1	4
71	2	1	7	2	3	1										83	1	2	2	1	6	1
72	2	2	7	0	2											85	2	1	1	0	7	1
73	1	1	7	0	2											86	2	2	2	0	5
74	2	2	6	0	1											87	2	2	2	2	6
75	2	1	7	0	3	1										88	2	2	3	4	5
76	2	1	8	0	4	1										91	1	2	0	1	3	1
77	2	1	7	1	2	1										94	2	1	0	4	6	1
78	2	1	7	0	4	1										95	2	1	2	2	4	1
79	2	1	7	0	0	1										96	2	2	0	0	4
80	2	1	7	0	2	1										ego-moving	49/71=69%	39/71=54.9%				35
81	2	1	4	0	0	1																35/71=0.49
82	2	1	6	0	3	1										valid subjects: 71
83	2	1	4	0	2	1										ratio: 71/96=74%
84	2	1	6	0	0	1
85	2	1	7	0	1	1
86	2	2	6	1	1
87	2	1	8	0	0	1
88	2	1	8	0	0	1
89	2	1	7	0	2	1
90	2	1	8	0	0	1
91	2	1	8	0	0	1
92	2	1	7	2	4	1
93	2	1	0	5	3	1
95	1	2	5	0	0	1
96	2	1	6	1	3	1
97	2	1	5	0	2	1
98	2	1	8	0	1	1
99	2	2	7	0	4
ego-moving:	75/90=83.3%	71/90=78.9%				68
						68/99=0.687
valid subjects: 90
ratio: 90/99=90.9%
Note: Question 1 ego-moving: 2 time-moving:1
Question 2 ego-moving: 1 time-moving:2
Consistency: If the answer of two questions are both ego moving or time moving, lable 1.

## Sheet: Study 2a
Happy Group								Angry Group								Anxious Group
Subject	Question 1	Question 2	Happy change	Angry change	Anxious change	Consistency		Subject	Question 1	Question 2	Happy change	Angry change	Anxious change	Consistency		Subject	Question 1	Question 2	Happy change	Angry change	Anxious change	Consistency
1	1	1	1	0	0			1	2	1	-4	6	-2	1		1	2	2	-1	1	1
2	1	1	2	-2	-1			2	2	1	-5	3	1	1		2	2	2	-2	0	1
4	2	2	2	0	-2			3	2	1	0	2	0	1		3	2	2	0	0	2
5	1	2	1	-1	-1	1		4	2	1	0	1	-1	1		4	2	1	0	0	1	1
6	2	1	4	0	0	1		5	1	1	-1	1	-4			5	1	2	0	0	4	1
7	1	1	1	-1	-2			7	2	2	-2	8	1			6	2	1	-1	0	1	1
8	2	2	3	0	-1			8	1	1	-2	2	-1			7	2	1	-2	0	1	1
9	2	1	7	-1	-2	1		9	2	2	0	1	0			8	2	2	-2	-1	1
10	2	2	3	0	0			10	2	1	0	2	-2	1		9	2	1	-2	2	4	1
11	2	2	8	-3	0			11	2	2	-2	3	-1			10	2	1	0	0	1	1
12	1	1	5	-1	-4			12	2	2	-4	1	-2			11	2	2	-5	1	2
13	1	2	3	0	-1	1		13	2	2	0	1	-2			12	2	1	0	-1	1	1
14	2	1	4	-3	-1	1		14	2	1	-2	2	0	1		13	2	1	-2	-2	1	1
15	2	1	5	0	-3	1		50	2	1	0	2	0	1		14	2	2	0	0	1
16	2	2	1	0	0			53	2	1	-3	3	1	1		15	1	1	-4	0	1
17	1	2	2	-1	-2	1		54	1	1	-1	2	-2			17	2	1	-2	1	2	1
18	2	2	6	0	0			62	2	2	-4	7	0			18	2	1	-2	0	1	1
19	2	1	1	0	-2	1		63	2	2	-2	5	3			19	1	1	-2	0	1
20	2	1	2	0	0	1		66	1	2	-1	3	0	1		35	2	1	3	9	9	1
21	2	2	3	-3	-5			73	2	2	-7	6	2			49	1	2	0	0	2	1
22	2	2	5	0	1			78	2	1	0	1	0	1		50	1	2	0	2	4	1
23	2	2	1	0	0			83	1	1	-2	2	1			53	2	2	-1	0	1
24	2	1	3	0	0	1		87	2	2	-2	2	1			58	2	2	-2	1	2
25	2	2	1	-1	-1			93	2	2	0	2	-1			60	1	1	-2	-2	2
26	2	1	4	0	1	1		97	2	2	-1	1	0			63	2	1	-1	0	1	1
27	2	1	3	-2	-4	1		98	2	1	-2	4	0	1		64	2	1	-2	1	3	1
28	2	2	2	0	0			99	2	2	0	5	-2			67	2	1	0	0	1	1
29	2	1	2	-1	-3	1		100	2	2	0	1	0			68	2	2	-2	0	1
30	1	1	2	0	-4			ego-moving:	23/28=82.1%	14/28=50%						74	1	1	0	0	1
31	2	2	2	0	-3									11/28=0.39		76	2	2	-1	0	2
32	2	2	3	0	-1			valid subjects: 28								77	2	2	0	0	2
33	2	2	2	0	-4			ratio: 28/99=28.3%								78	2	2	-2	0	2
34	1	1	1	-2	-2											83	2	2	-1	0	4
35	2	1	3	0	2	1										85	2	1	-1	-2	1	1
36	2	1	4	0	0	1										87	2	2	0	0	1
37	2	2	2	0	0											88	2	1	-4	1	2	1
38	1	2	4	-4	-4	1										94	1	1	0	0	1
50	2	1	4	0	0	1										95	1	1	0	0	1
52	2	2	1	-1	0											97	2	1	-2	0	2	1
53	2	2	1	0	-1											ego-moving:	30/39=76.9%	22/39=56.4%				19
54	2	1	8	0	-5	1																19/39=0.49
55	2	2	4	-1	-1											valid subjects: 39
56	2	1	1	-2	-2	1										ratio: 39/97=40.2%
57	2	1	3	0	0	1
58	1	2	2	-1	-2	1
60	2	2	2	0	-3
61	2	1	1	0	-1	1
65	2	2	3	0	0
67	2	2	2	0	0
70	2	1	1	-1	0	1
71	2	2	1	-1	-1
72	2	2	1	0	-2
73	2	2	1	0	0
75	2	2	2	-1	-3
76	2	2	1	0	0
78	2	1	1	0	0	1
80	2	1	1	-1	-1	1
81	2	2	8	-4	-8
82	1	1	1	-4	-4
83	1	2	1	-1	0	1
84	1	2	1	0	0	1
86	2	1	2	0	-1	1
87	2	2	2	-2	-2
89	2	1	2	0	-2	1
90	2	2	1	-1	-1
91	2	2	2	-2	-2
96	2	1	1	0	0	1
97	2	1	1	0	0
98	2	2	3	0	-3	1
ego-moving:	55/69=79.7%	31/69=44.9%				31
						31/69=0.45
valid subjects: 69
ratio: 69/98=70.4%
Note: Question 1 ego-moving: 2 time-moving:1
Question 2 ego-moving: 1 time-moving:2
Consistency: If the answer of two questions are both ego moving or time moving, lable 1.

## Sheet: Study 2b
Happy Group								Angry Group								Anxious Group
Subject	Question 1	Question 2	Happy change	Angry change	Anxious change	Consistency		Subject	Question 1	Question 2	Happy change	Angry change	Anxious change	Consistency		Subject	Question 1	Question 2	Happy change	Angry change	Anxious change	Consistency
1	2	2	1	0	-1			1	2	1	-2	7	1	1		2	1	1	-2	-1	5
2	2	1	3	0	-1	1		3	2	1	-4	5	-1	1		3	2	2	-2	0	6
3	1	2	3	0	2	1		4	2	1	-1	2	0	1		4	2	2	-1	0	5
4	2	1	2	1	1	1		6	2	1	0	2	-3	1		5	2	1	-3	0	5	1
5	1	2	4	0	-1	1		8	2	2	0	7	2			7	2	1	-5	1	3	1
6	2	1	3	0	-1	1		10	2	1	-3	3	1	1		8	2	2	-3	3	6
7	2	1	2	0	0	1		11	2	1	-1	7	-3	1		12	2	2	-4	0	1
8	2	1	3	0	-1	1		12	2	1	-3	4	3	1		18	1	2	0	1	6	1
9	2	1	1	0	-1	1		13	2	2	-2	5	2			26	1	2	-6	0	7	1
10	1	2	1	-1	-2	1		14	2	1	-1	2	-1	1		27	1	2	-2	0	2	1
11	2	1	2	0	-2	1		15	2	2	-1	2	0			28	1	2	-6	1	5	1
12	2	2	1	0	0			16	2	2	-1	1	0			30	1	2	-1	0	4	1
13	2	2	2	0	-1			17	2	2	-2	1	-2			31	2	2	-4	6	7
14	2	1	1	0	-1	1		19	2	2	-1	2	1			32	1	2	0	0	3	1
15	2	1	2	0	0	1		20	2	1	-2	2	1	1		34	1	2	-6	5	7	1
16	2	1	3	-1	-3	1		21	1	1	-4	3	1			ego-moving	7/15=46.7%	3/15=20%				9
17	2	1	3	-2	-5	1		22	1	1	-1	1	2									9/15=0.6
18	1	1	1	-1	-1			23	2	2	-2	1	-1			valid subjects: 15
19	2	2	2	0	-1			24	2	1	0	1	0	1		ratio: 15/34=44.1%
20	2	2	4	0	-4			25	2	2	-3	5	-1
21	2	2	2	0	-1			27	1	1	-1	1	0
22	2	1	1	-1	-1	1		28	2	1	-1	3	0	1
24	2	1	1	-1	0	1		29	2	2	0	3	0
25	2	2	2	-2	-1			30	1	1	-2	2	-2
26	2	1	1	0	-1	1		32	2	2	0	4	0
27	2	1	2	0	-1	1		34	1	2	0	2	0	1
28	1	1	2	0	-1			ego-moving:	21/26=80.8%	15/26=57.7%				12
29	2	2	1	-3	0									12/26=0.46
30	2	2	6	0	0			valid subjects: 26
31	2	1	3	0	-3	1		ratio: 26/34=76.5%
32	1	1	2	0	-2
33	2	1	1	0	-1	1
34	2	1	3	-1	-1	1
ego-moving:	27/33=81.8%	21/33=63.3%				21
						21/33=0.64
valid subjects: 33
ratio: 33/34=97.1%
Note: Question 1 ego-moving: 2 time-moving:1
Question 2 ego-moving: 1 time-moving:2
Consistency: If the answer of two questions are both ego moving or time moving, lable 1.
